# Supplementary material for: LAV-BPIFB4 associates with reduced frailty in humans and its transfer prevents frailty progression in old mice
Source: PubMed Central journal article supplement (PMC6738439; doi:10.18632/aging.102209), 2019-08-28
Supplement: aging-11-102209-s002.pdf [file aging-11-102209-s002.pdf]

**Supplementary Table 1. Prevalence of physical frailty (Fried’s phenotype) in treated and control mice at the 3<sup>rd</sup> month (before treatment) and at the 7<sup>th</sup> month (after treatment) from the inclusion in the study\*.**

| Age of mice at the beginning of the study | Status    | Month 3<br>(Before treatment) |            | Month 7<br>(Post treatment) |            |
|-------------------------------------------|-----------|-------------------------------|------------|-----------------------------|------------|
|                                           |           | Control                       | LAV-BPIFB4 | Control                     | LAV-BPIFB4 |
|                                           |           | <b>Adult mice</b>             | Frail      | 2 (8.3%)                    | 1 (4.5%)   |
|                                           | Non-frail | 22 (91.7%)                    | 21 (95.5%) | 19 (90.5%)                  | 20 (95.2%) |
| <b>Old mice</b>                           | Frail     | 4 (15.4%)                     | 3 (10.7%)  | 8 (44.4%)                   | 5 (20%)    |
|                                           | Non-frail | 22 (84.6%)                    | 25 (89.3%) | 10 (55.6%)                  | 20 (80%)   |

\*Data are reported as number of mice (%). At month 3: p = 0.741 by Fisher’s exact test; At month 7: p = 0.170 by Fisher’s exact test; The reduced number of mice at month 7 is due to death events occurring during the study.

**Supplementary Table 3. Measurement performed to define Physical Frailty phenotype\*.**

| Criterion     | Shrinking              | Weakness                     | Endurance                    | Slowness                                                                                      | Activity                                                   |
|---------------|------------------------|------------------------------|------------------------------|-----------------------------------------------------------------------------------------------|------------------------------------------------------------|
| Measurement 1 | Current weight         | Grip strength meter          | Treadmill distance           | Highest speed interval that the mouse traveled for at least 3 s in an open field test (5 min) | % the mice walked or run in a 5-min open field test        |
| Measurement 2 | Weight loss in 1 month | Dynamometer force            | Mean time at Rotarod test    | Mean stride length                                                                            | Total distance run by the mouse in a 5-min open field test |
| Measurement 3 | Weight loss in 2 month | Increasing weights lift test | Increasing weights lift test | Max speed at rotarod test                                                                     | -                                                          |

\*For each criterion a composite Z-score was derived as the mean of the Z-scores from each measurement. Mice that fell in the bottom 20% of our cohort for the composite score computed for each criterion (Shrinking, Weakness, Endurance, Slowness and Activity), were assigned one point. The mice were considered as frail when they reached 3 or more points on a maximum of 5.
