# Supplementary material for: LAV-BPIFB4 associates with reduced frailty in humans and its transfer prevents frailty progression in old mice
Source: publisher site journal article supplement (doi:10.18632/aging.102209), 2019-08-28
Supplement: Supplementary file [file aging-v11i16-102209-supplementary-material-SD1.pdf]

# SUPPLEMENTARY FIGURE

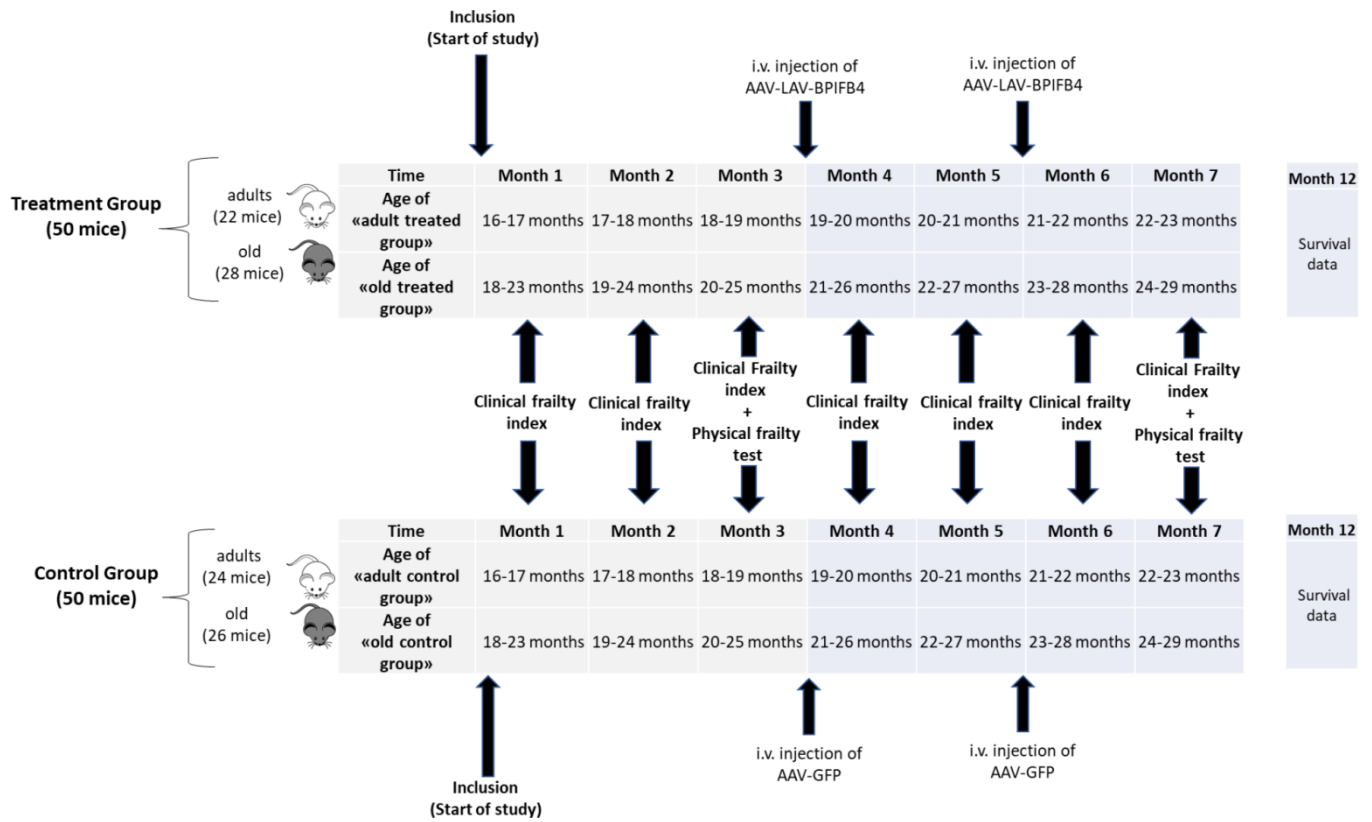

**Supplementary Figure 1. Schematic of the study design adopted\*.\*** The age of the mice refers to the range of age at the beginning of the indicated month from the inclusion.
